# Supplementary material for: One-step chemically controlled wet synthesis of graphene nanoribbons from graphene oxide for high performance supercapacitor applications
Source: Royal Society of Chemistry journal article supplement (doi:10.1039/c5ta07603j), 2015-01-01
Supplement: c5ta07603j1.pdf [file c5ta07603j1.pdf]

## Electronic Supplementary Information

### One-step chemically controlled wet synthesis of graphene nanoribbons from graphene oxide for high performance supercapacitor applications

Mahima Khandelwal and Anil Kumar\*

Department of Chemistry, Indian Institute of Technology Roorkee, Roorkee - 247667, India

E-mail: [anilkfcy@iitr.ac.in](mailto:anilkfcy@iitr.ac.in); [akmshfcy@gmail.com](mailto:akmshfcy@gmail.com)

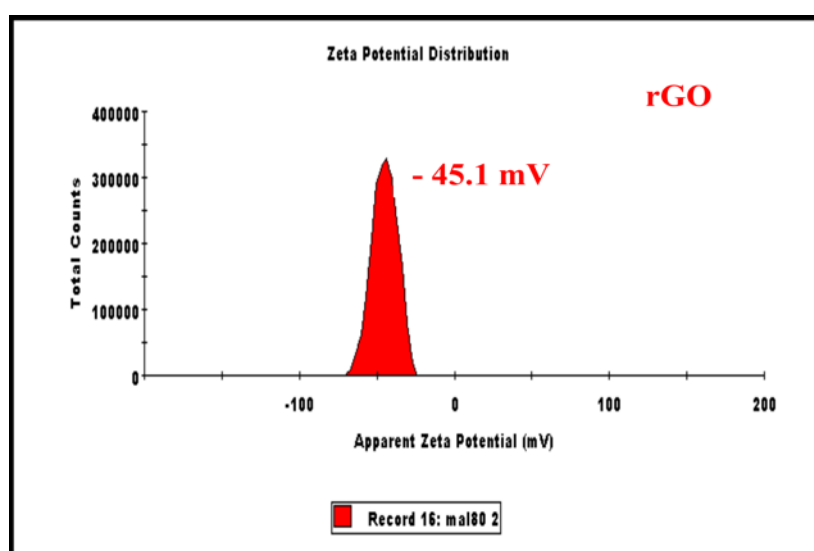

Fig. S1: Zeta-potential of reduced graphene oxide (rGO).

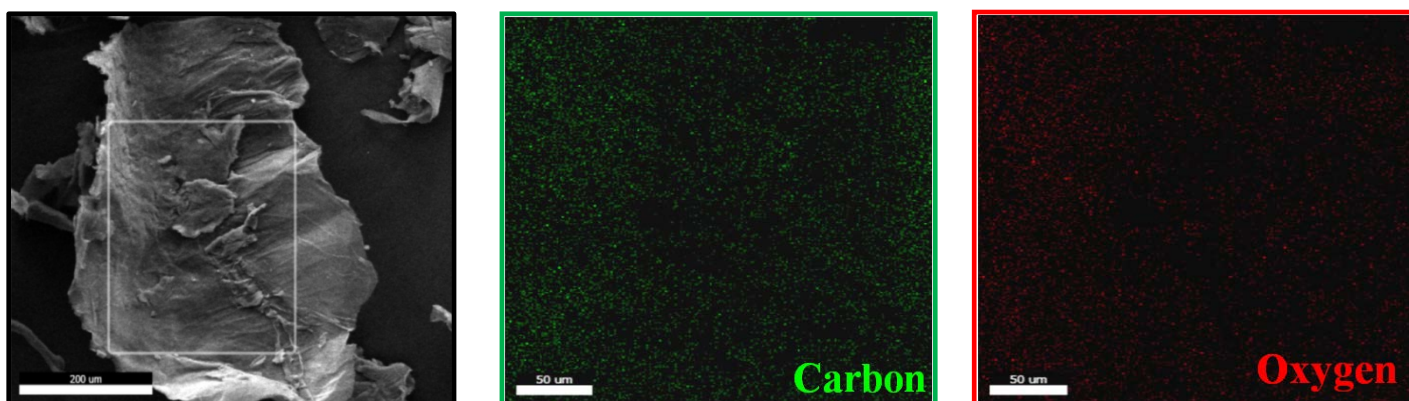

Fig. S2: FESEM image of GO and elemental mapping of the marked region in this image.

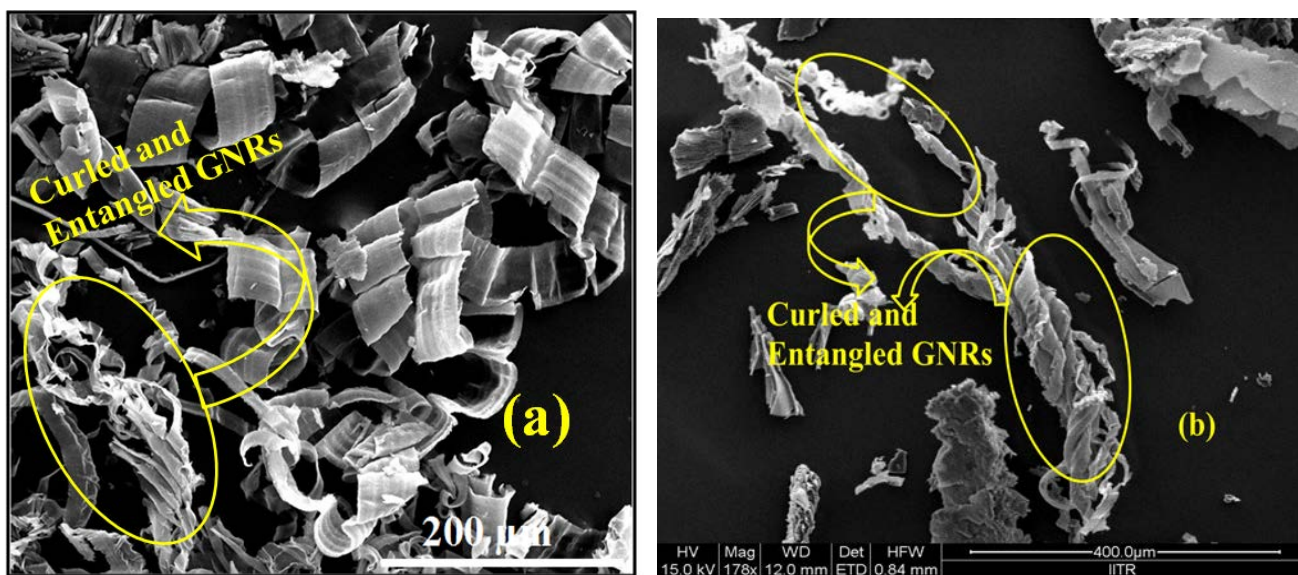

**Fig. S3:** FESEM image of GNRs at low resolutions showing ~ 0.15 to 1 mm long curled and entangled GNRs at pH 6.0 (a) Scale bar 200 μm; (b) Scale bar 400 μm.

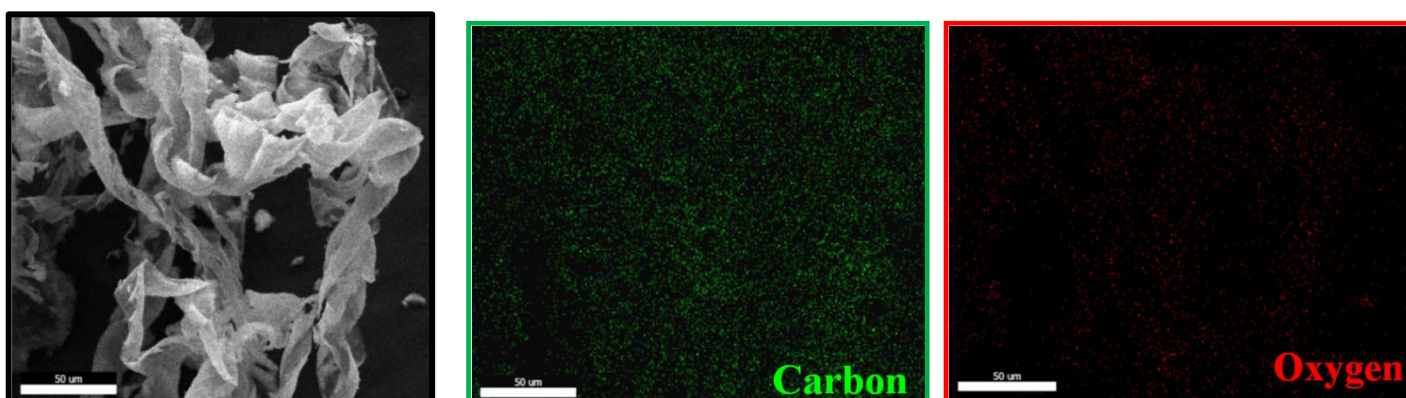

**Fig. S4:** FESEM image of GNRs and elemental mapping.

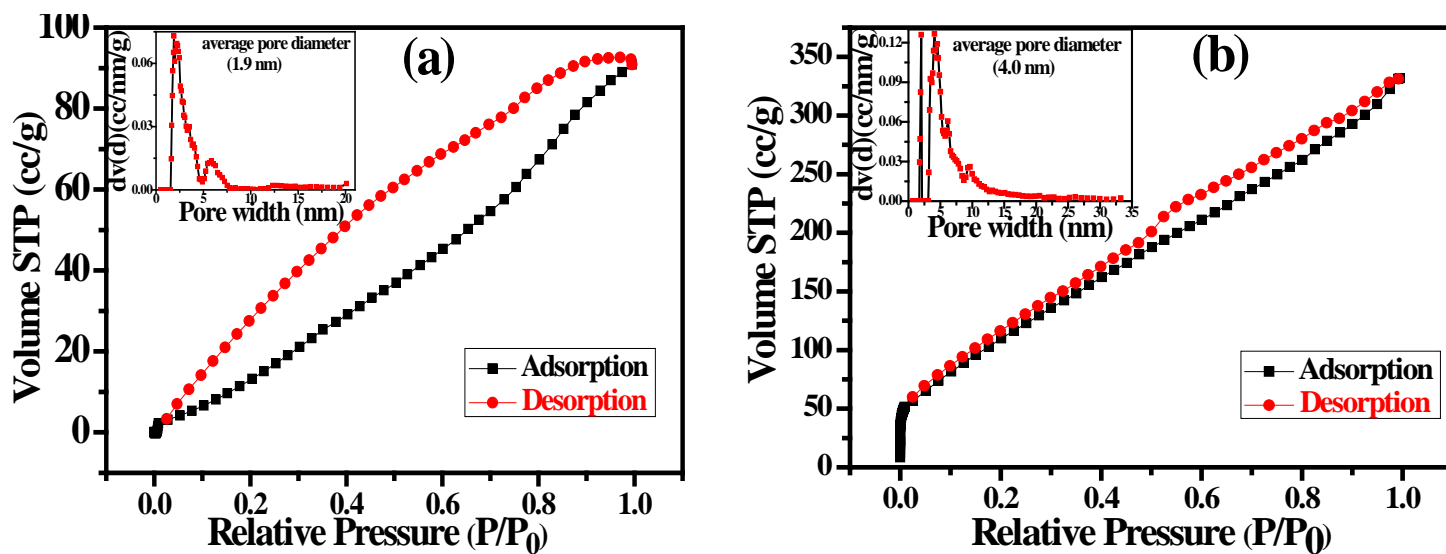

**Fig. S5:** N<sub>2</sub> adsorption – desorption isotherm for GNRs (after smoothing) (a) and GNRs-300 (b); Pore size distribution analyzed from density functional theory (DFT) method – Inset.

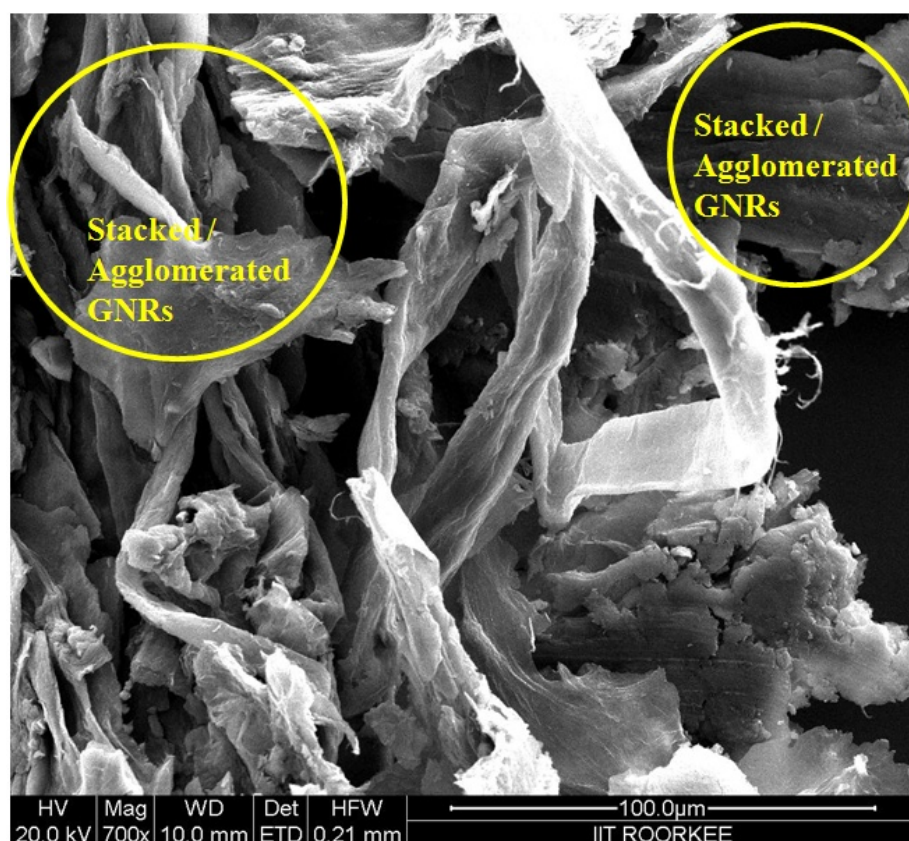

**Fig. S6:** FESEM image of GNRs at pH 7.5 showing the stacked agglomerated GNRs. Scale bar: 100 μm

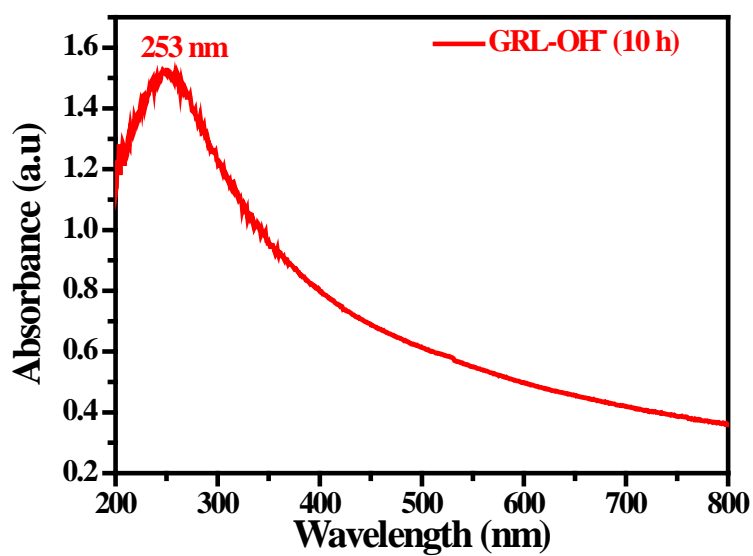

Fig. S7: Optical absorption spectrum of GRL-OH after 10 h of reaction.

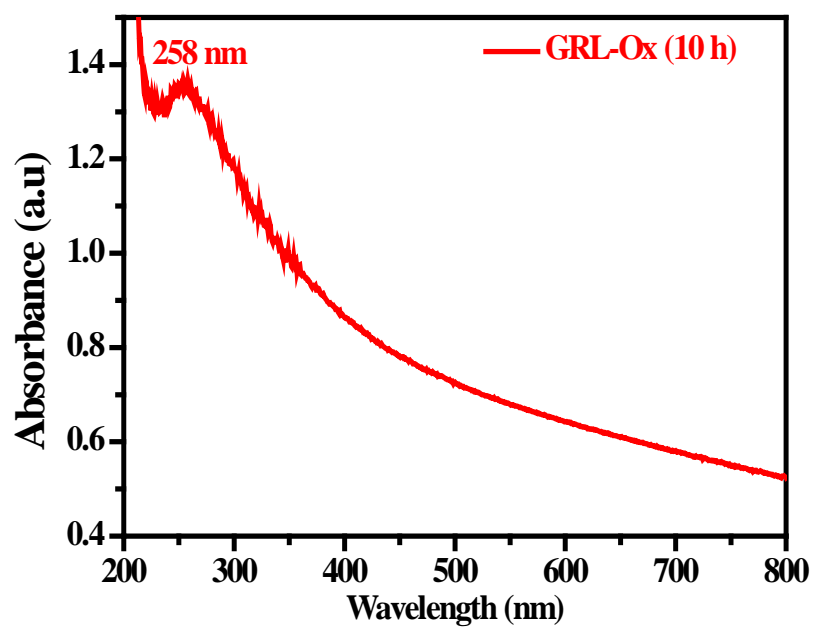

Fig. S8: Optical absorption spectrum of GRL-Ox after 10 h of reaction.

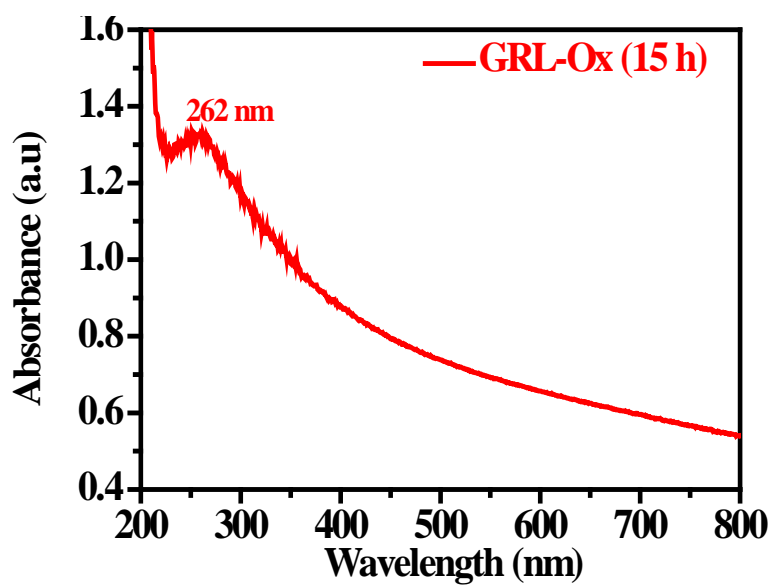

Fig. S9: Optical absorption spectrum of GRL-Ox after 15 h of reaction.

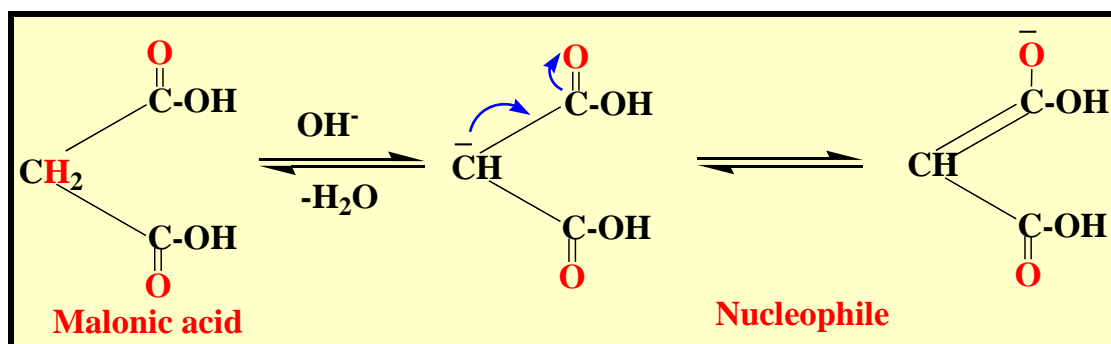

Fig. S10: Resonating structures of malonic acid.

**Table S1:** Raman spectral data of graphite, GO, GNRs and GNRs-300.

| <b>Sample</b>   | <b>D band<br/>(cm<sup>-1</sup>)</b> | <b>G band<br/>(cm<sup>-1</sup>)</b> | <b>I<sub>D</sub>/I<sub>G</sub></b> |
|-----------------|-------------------------------------|-------------------------------------|------------------------------------|
| <b>Graphite</b> | 1359                                | 1582                                | -                                  |
| <b>GO</b>       | 1355                                | 1604                                | 0.88                               |
| <b>GNRs</b>     | 1351                                | 1605 (D' 1623)                      | 0.97                               |
| <b>GNRs-300</b> | 1359                                | 1599                                | 0.94                               |
